# Supplementary material for: Physiological and Behavioral Effects of SiO2 Nanoparticle Ingestion on Daphnia magna
Source: MDPI journal article supplement (doi:10.3390/mi12091105), 2021-09-14
Supplement: s1 [file s1]

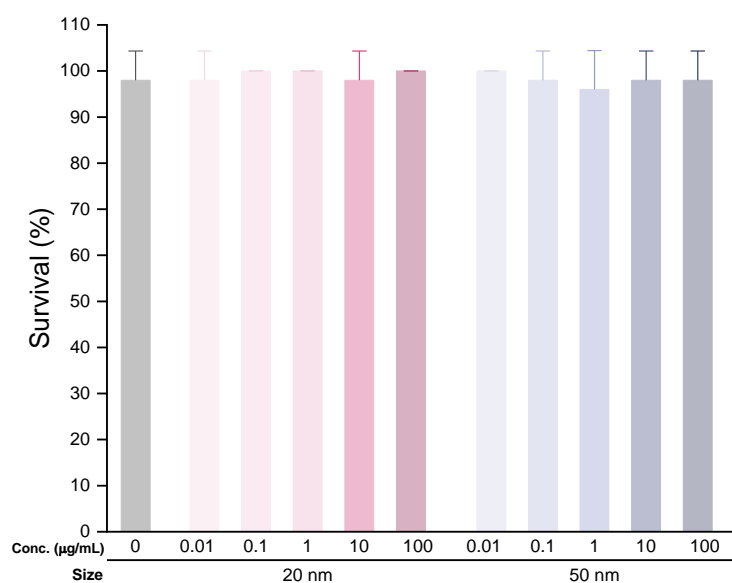

Figure S1. Survival (%) of *D. magna* upon exposure to SiO<sub>2</sub> NPs after 48 h. Neonates were exposure to SiO<sub>2</sub> NPs of various concentrations (0.01, 0.1, 1, 10, 100 µg/mL). Bar indicates the mean. Error bar express standard deviations.

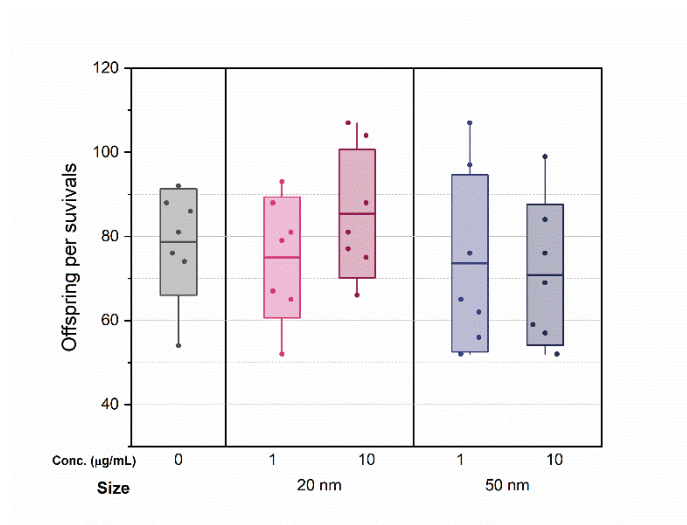

Figure S2. The number of total neonates reproduced during 21 days. The mothers were exposed to SiO<sub>2</sub> NPs (20 and 50 nm) of two concentrations (1, and 10 µg/mL). Boxes express standard deviations; central line indicates the mean.

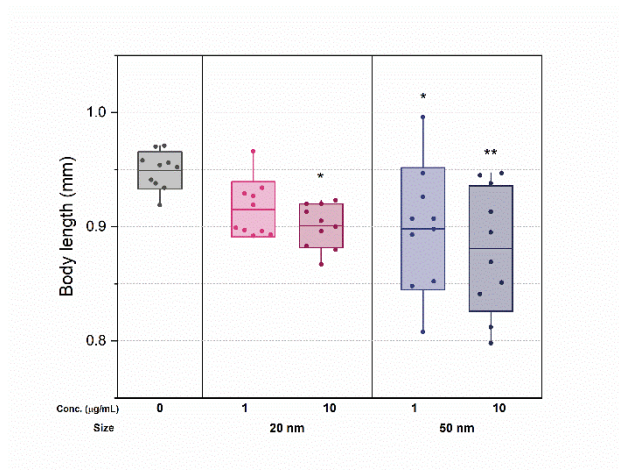

Figure S3. Body length of neonates for each treatment group. The 3<sup>rd</sup> brood of ten neonates was randomly pooled. Boxes express standard deviations; central line indicates the mean. \* and \*\* indicate  $p < 0.05$  and  $p < 0.01$  relative to the control group, respectively.

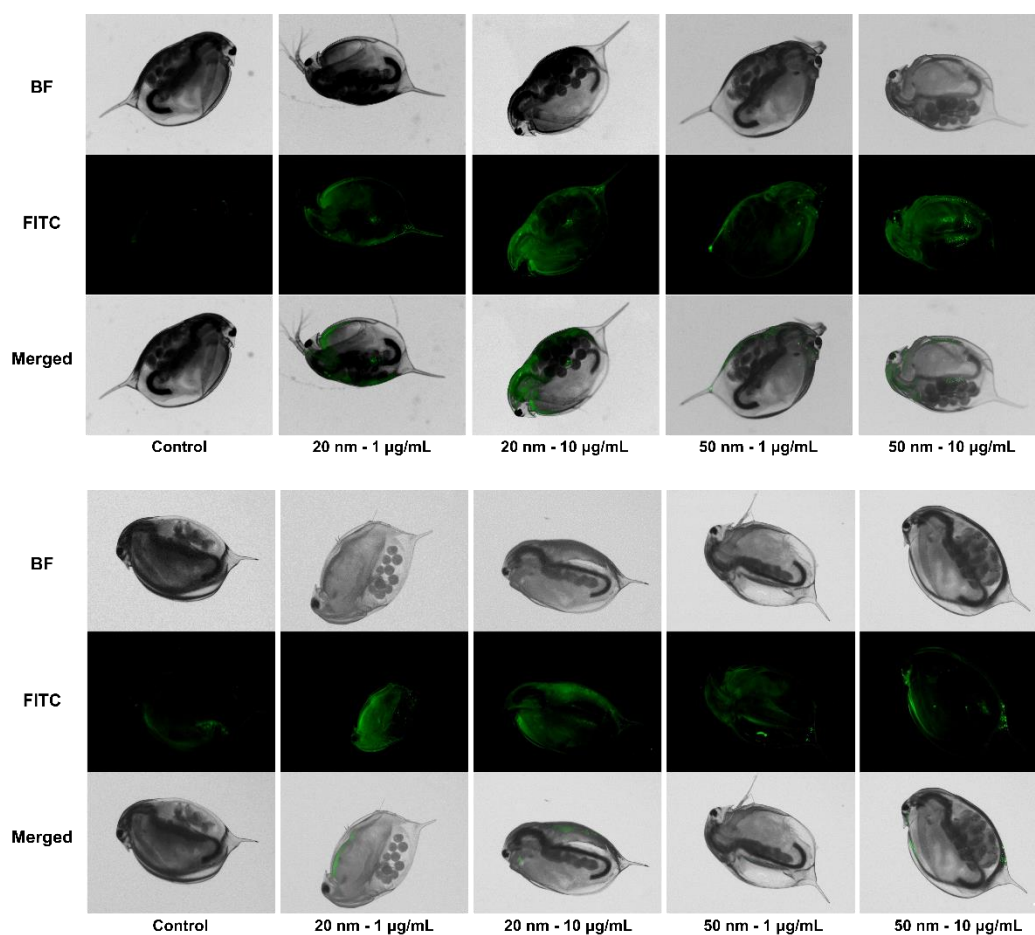

Figure S4. Fluorescence images of *D. Magna*. Daphnids were exposed to SiO<sub>2</sub> NPs for 14 (above) and 21 (below) days. Scale bar = 500 µM. BF = Bright field.

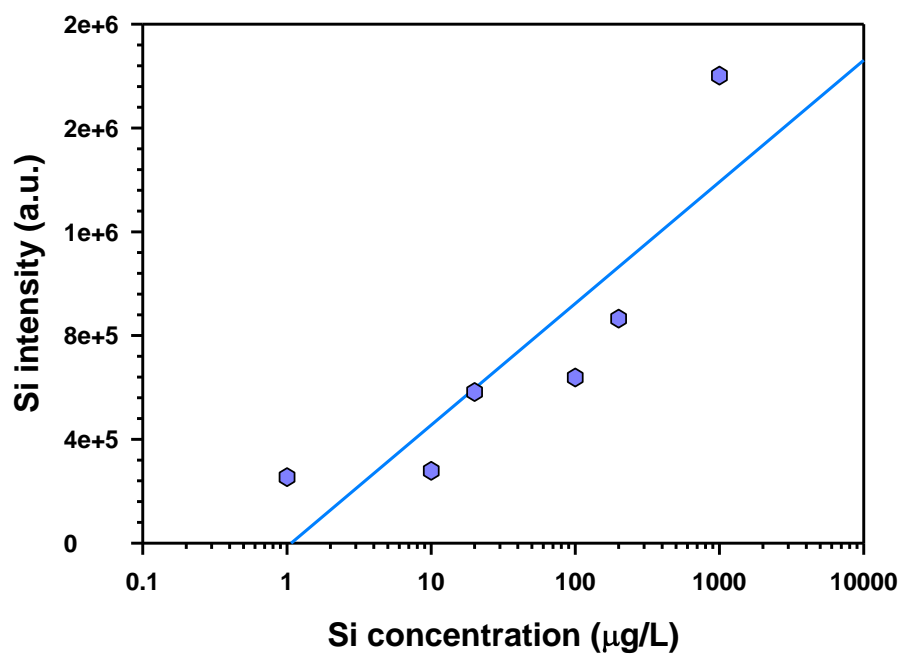

Figure S5. The calibration curve of Si measured with ICP-MS. Standard Si concentration was plotted in log scale and R-square value is 0.9367. This value has an error of  $\pm 0.008$  as the standard solution has relatively broad error concentration as  $997 \pm 4$  mg/L.
